# Supplementary material
Source: Springer Nature journal article supplement (https://springermedizin.de/resource/supplementary/13075_2012_3844_MOESM1_ESM.pdf/9695464)

IL-6 (pg/mL) in synovial fluid

10,000  
1,000  
100  
10  
1

H

CD

OA

b

a

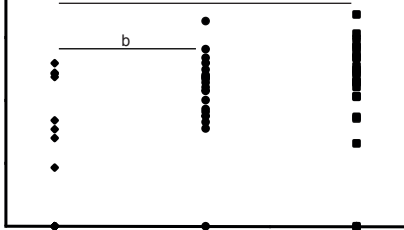

Supplement: MOESM1 [file 9695464]
